# Supplementary material for: Is the Cis-Element CACCC-Box a Master Regulatory Element during Cardiovascular Disease? A Bioinformatics Approach from the Perspective of the Krüppel-like Family of Transcription Factors
Source: MDPI journal article supplement (doi:10.3390/life14040493), 2024-04-11
Supplement: s1 [file s1]

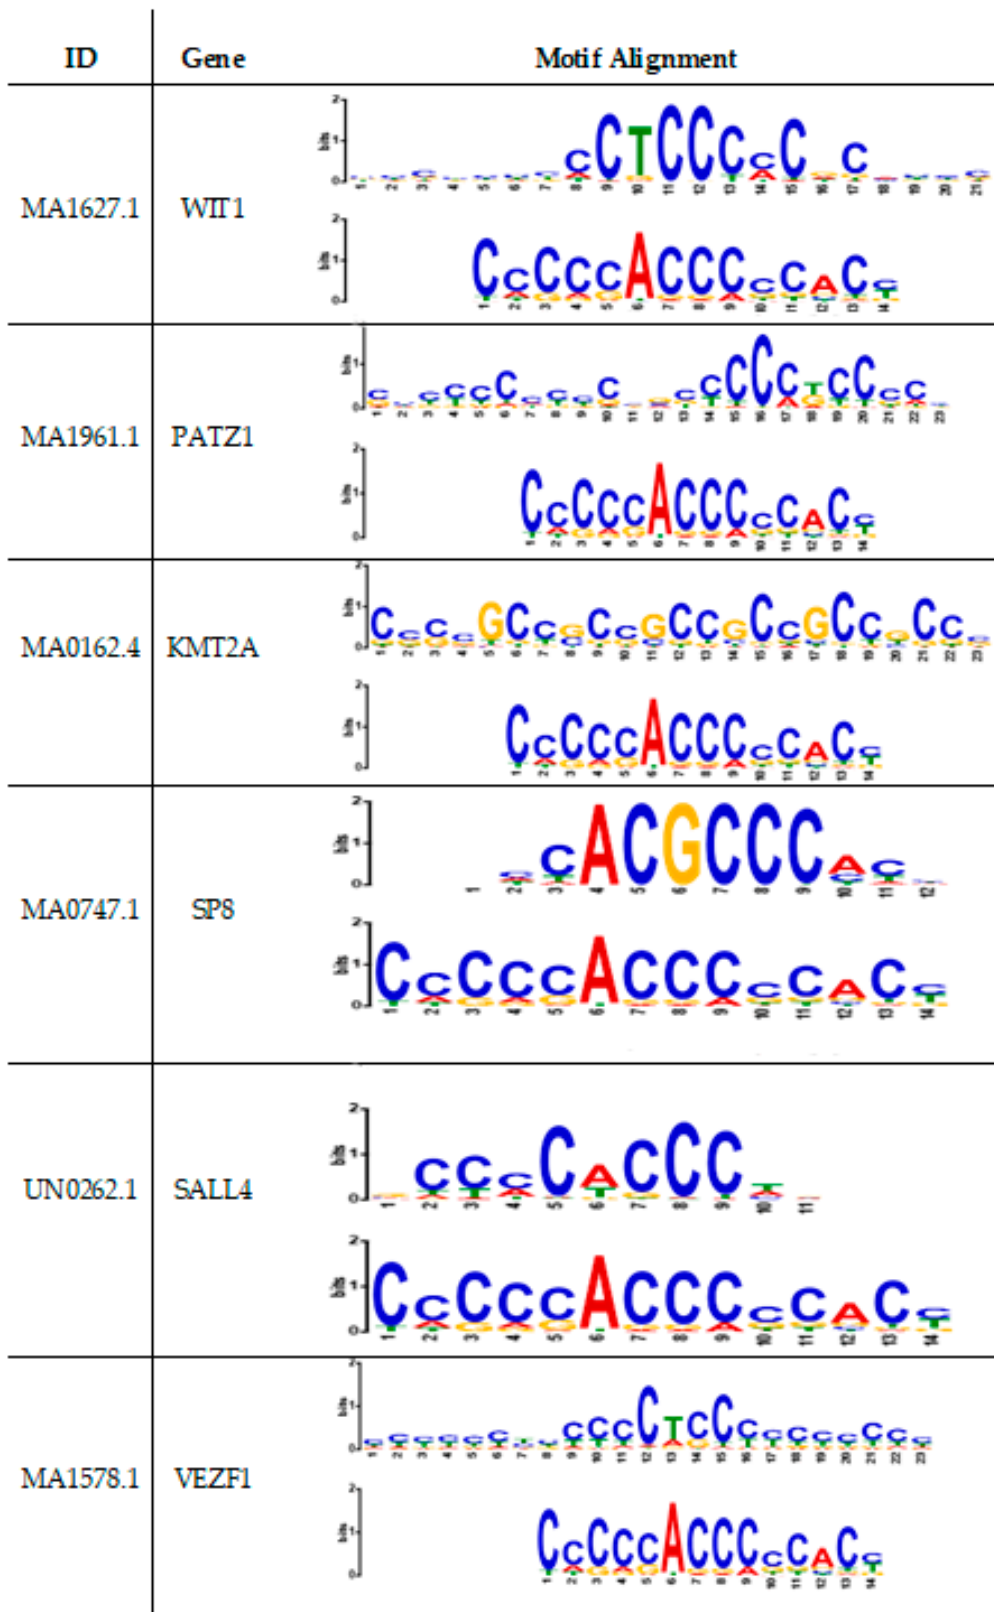

Supplementary Figure S1. CACCC-box binding partners (Non-KLFs).

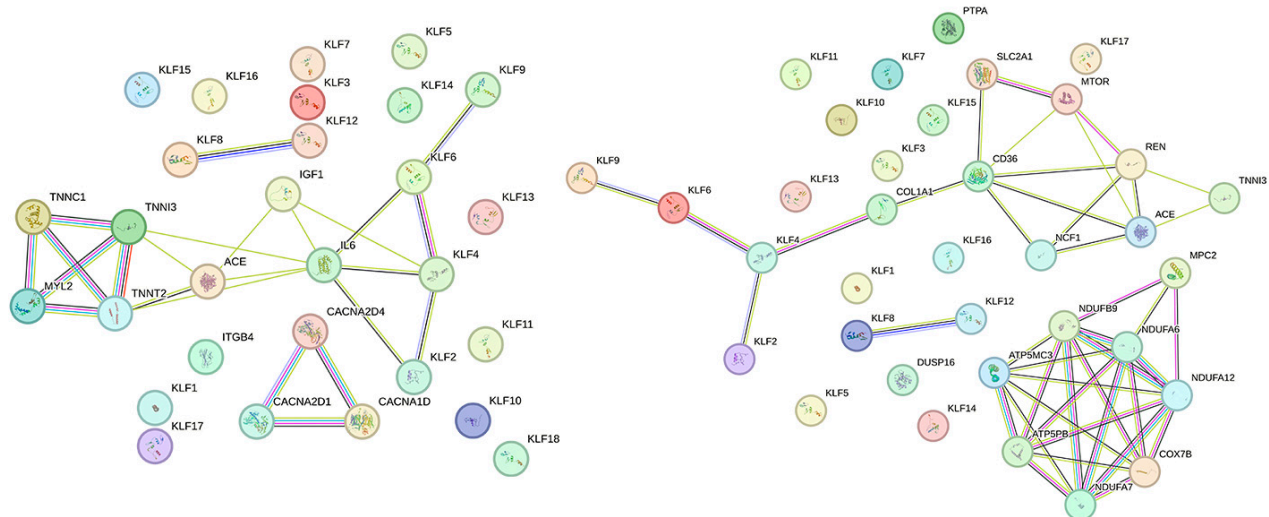

**Supplementary Figure S2.** KLF and CACCC-box gene interactions: (Left) Hypertrophic cardiomyopathy, (Right) Diabetic cardiomyopathy

**Supplemental Table S1.** Python analysis results of 3044hits from Signal Search Analysis Server resulted in 40 representative sequences.

| Region   | Sequence                                                                                                                                                                                                                                                                                                                                                                                                                                                                                                                                                         |
|----------|------------------------------------------------------------------------------------------------------------------------------------------------------------------------------------------------------------------------------------------------------------------------------------------------------------------------------------------------------------------------------------------------------------------------------------------------------------------------------------------------------------------------------------------------------------------|
| FP001062 | CAGTTAG- <u>GGGTG</u> -CGCTGGAGA- <u>GGGTG</u> -GGGCCCCACTCCGCCA- <u>CACCC</u> -<br>CAACGGTCCTTCCCCCTCCTCACTACTCCCGCCCC- <u>CACCC</u> -<br>CCAATGGATCTGGGACTGCCCCTTTAAGAGTAGTGGCCCCTCCTCCCTTCAGAGGAGGACCTATTAGAGC<br>CTTTGCCCCGGCGTCGGTGAAGTCTGCGGGAGCGCCGACCTACACCAGCCAACCCAGATCCCCG<br>AGGTCCGACAGCGCCCGGCCAGATCCCCACGCCTGCCAGGAGCAAGCCGAGAGCCAGCCGGCCGGCG<br>CACTCCGACTCCGAGCAGTCTCTGTCTTCGACCCGAGCCCCGCGCCCTTTCCGGGACCCCTGCCCCGCG<br>GGCAGCGCTGCCAACCTGCCGGCCATGGAGACCCCGTCCAGCGGCGCGC- <u>CACCC</u> -<br>GCAGCGGGGCGCAGGCCAGTCCACTCCGCTG                    |
| FP001404 | AGCCGAGGTTCTGCTACTCCAGGAGCCGAGGTTCTAACGTGGTCTGCGTCCAGCGCCCC- <u>CACCC</u> -<br>CTACTCC- <u>CACCC</u> -CTACCCC- <u>CACCC</u> -C- <u>CACCC</u> -TTCAACCCGCCCCCTACCCCAAGC- <u>CACCC</u> -<br>CGTGGCCGCGAGCCAAGAGGTCCCTTTAAAGGCGCGAGTCCCGCCCCACTGCTCATTAGGGCTTTCGAT<br>TGGCGGCTCCTGGGCGGGCGGGGCCCGGCTGGGCTCGGGGCTGGCTCGGGGCGGGCTCGGGGCCGGA<br>TCGGCCCCCGCCCCCTTTGTTCGCGCTGCGGCGGGAGGTGGTGCC- <u>GGGTG</u> -<br>GGAGGTGTGTGCGCTGTGCCGCGCCGTAGGGAGCGGGGTCGCGCCGCGGGCTGTGAGCTAGCTCCG<br>CGCCGCGCCCGATGGCGCGAGGAGGCGCGGGGCCAGCCCCGGGGGGCGGGCGC- <u>GGGTG</u> -<br>AGCCCC |
| FP006896 | ACCCCTCGGTAATCCCGTACTCCCTTAGCGGGCGGGCCACTGCAGCGTGCCACCGCCCC- <u>CACCC</u> -<br>CCATCCCCCATCCCCG- <u>CACCC</u> -CCCTC- <u>CACCC</u> -<br>CCTAGCCCGCGGAGCAGCTGGGATTTGGCGCCCCCTCCTCGGTGCAACCTATATAAGGCTCACAGTCT<br>GCGCTCCTGGTACACGCGCTTCAACTTCGGTTGGTGTGTGTCGAAGAACTGACTGCGCCCTGAGGAGA<br>ACAGCGGAGAAGGTCCACCGAGCCTGGCGAAAGTCCGCTGAGCGGGCTGCTGTCGGAGCCACTCCG<br>GGCTGCGGAG- <u>CACCC</u> -<br>AGTGGAGACCGCGCTGGCTCAGGTGTGGGACCCCATCCTTCCTGTCTTCGAGAGGAGTCTCGCGTGG<br>TGAGTATGCGGTGAGGACGTTTTTTTTTAAAGATACGTTTCATTCCCCGTGCTTATCGGG                                  |
| FP009159 | GTCCCAACTGGGAGGGGCCCTGGCAGCATGAAACCCC- <u>CACCC</u> -<br>CCACTCTCTGCGACGGCCAGATGGAGGGCAGGAGGAACAGCGGTTACGCCCTGGCTGGGGCTGCAGG<br>GGCTG- <u>GGGTG</u> -<br>TGTTACTCACTGGCAGCATGGAGAACTGCATGAAGAGGCAGGTAAGTTCTGTGGCGGCCAGCACGTAGG<br>TAAGCAAGATGACCGAGGACCGGCCCTAGAGCGCTCATCTGCCGGGGACCGGCCCTGGTCCCTGGGAG<br>CCCAGCTCCCTGCATCCTGGACAGGCGCAGCAGGAGACCCAGGAGAGATCCAAGCAGGAGGCTGGC<br>GGAGCAGGGGGCAAAAGTCCAGTTGATCCGGGCGAG- <u>GGGTG</u> -CTGAGTCACTGGGTCCAGGCAG-<br><u>CACCC</u> -GCCTGGCCTTGCTGCAAGAGAGGACAGCACTGCAGGACCCCTCCCCAGTGGAGCT                             |
| FP009252 | GGTGAGTGTAGGCCGGCGGGGCCAGCGACGCGATCCCGCG- <u>CACCC</u> -CGTCGGGGGCCGTTAG-<br><u>CACCC</u> -<br>TCGCGGGCGCTGCGCCCCTGCCGCCGCCCCGGGGCAACCCGGCCGCCGAAGAACCCTGCCCCGACGTGC<br>CCGCTGCCGGCCTTAAAGGGCCCGTGACCGCTCCCTGCCCC- <u>CACCC</u> -<br>GGGCCGTGGGGAGGCTGCGCCCCTTAAAGGCGCCGCGCCCTCCGCCCCATCCTCCTCGCGGGGGCTG<br>CCGCTGCGGGCTAGGGCAGGCAGAGGTGCTGCAGGAGCCCTTAAAGGGGCCGGGAAAGTGTTCGCTGG<br>AGTACCCACCGCCCTCCGCGGGCATCGTACCTGGCGGGGGGAGGGGGCAGCTAGCTGCCTCTTAAAG<br>GGATAGCTCTGCCCTTGGGGGCACTGACTCGGCCGAAGAGGACTCCTAGATGTGTCCCCGGG                                        |
| FP010074 | GGCTGGGACTGGGGTCCAGGAGGCCCTACCCC- <u>CACCC</u> -TGTGAGAGGTAG- <u>GGGTG</u> -<br>TGGGGAAGGCAGCAGGGGAGGATGGCAATAAGAGGGAGGCTGGGATGAGATCTCAAGCTCTGGGGTCG                                                                                                                                                                                                                                                                                                                                                                                                             |

|          |                                                                                                                                                                                                                                                                                                                                                                                                                                                                                                                            |
|----------|----------------------------------------------------------------------------------------------------------------------------------------------------------------------------------------------------------------------------------------------------------------------------------------------------------------------------------------------------------------------------------------------------------------------------------------------------------------------------------------------------------------------------|
|          | GTACTTCAGAGGGAAAGGAAGAGATTATAAAGGAAGGAAAGAGTAGGGAAGAGAAGAAAATGAGAAT<br>TCCTATGTAGCAGGCTCTGTGCTGGGCACTGCACCTGCAGTCCGTTTTTTTTTGTGTGTGTGTAGAGTCTT<br>GCTCGGTCGTCCAGATGGAGTACAGTGGCACCATCTCCACTCACTGCAGCCTAGACCTCCCGGGTTCGAG<br>AGATTCTCGTGCCTCAGCCTCCTGAGTAGCTGGAATCACAGGCATGCACCACCACGCCCAGCCTGTCATT<br>GATTTTTACCAAAATTTTCCACCGTTGGAAGGGACATTAGGCTTGGCGA                                                                                                                                                                    |
| FP017185 | AGACGGGTTTTAACCATGTTGGCGAGGATGGTCTCGATCTCTTGCCACATGATC- <u>CACCC</u> -<br>GCCTCCGCCCCCAAAGTGCTGGGATTACAGGCGTGAGCCACCGCGCCCGGTCATGGAGTGAGTTTTGA<br>AGGCTGACTTTATTTGAGGTATTTGAGTCTGGTGGGGGGGAACCCACACACAGAGAGGAGGGATTCCA<br>AAGTCGTTAATGGGGACCTGGGAAGGAGCATAGGACAGGGCAAGGCGGGATAAGGAGGGGCACCACA<br>GCCCTTAAGGCACGAGGGAACCTCACTGCGCATGCTCTTTGGTGCCACCTCAGTGCGCATGTTCACTG<br>GGCGTCTTCCCATCGGCCCCCTTCGCCAGTGTGGGGAACGCGGCGGAGCTGTGAGCCGGCGACTCGGGTC<br>CCTGAGGTCTGGATTCTTTCTCCGCTACTGAGACACGGCGGGTAGGT                         |
| FP013339 | GCCCTTCCTGCCTTCTTGCCGGGAGGAAGTAGTGAGCCCCAAAATCAGAGGCC- <u>CACCC</u> -<br>AGCGCCCCAGAGGGCCTGGTCAGAGGTCTCCCTGCTCCCCAGGAGGGCAGGCGCCCCAGATCCTCTCC<br>CCTCCTTCTCGCTGGCCGAGATAAGCCCCAGGGCCCCAGCCTGGCACAGACTGTGGGCACCAGTGGC<br>TTCTGTGCAAGGACTGAAGT- <u>CACCC</u> -<br>AGCAGGCTGCCCTTCCACAGGCGAGATCACCAGGTTCTGTGGCCAAAGAGGTGGAGCTGCTGCTGAA<br>AACCTGGCTACCGGGGA- <u>GGGTG</u> -<br>CTGTGCAAAACCATGTCTGGTATGGGGCAGGGACAGAGCCGGGAGGCGGCTGTGGCCCCACAGAA<br>AGAGCCTCTTGCTCTGCCAGGATATCAGACTGTCTTTCCCCAGGCACTGCTACGATGGAGAGCCTAC       |
| FP016445 | GGCCAGCTCAGGGCACCGA- <u>GGGTG</u> -GCCGGGTCTGCTGTCAAGGTGAGGAGCT- <u>GGGTG</u> -<br>CCTCTGCCGGGGCCCTGGCCCAAGGAGAGTGTACGGGGAAGGCTGCAGCATGGCC- <u>CACCC</u> -<br>AGGACTTCTGGGGATGAGTCTTGTTTTCTGTTTTATAGAAACACAGATCTTTGTCCTAACACAAGGTTT<br>CCCTTTGGTTTATGTGGTTTCTCTGGTTCTGCCACCACCACCTCCCCAGGCCGGGGCCTTCCCATCCCTG<br>CCCAGTGGGGAGTGGGAGGAAGAGCCTGGGACAGTGGCCATACGTCCCGGGCTGATTTCTGGATTGGGG<br>GTTCTGGGGACCAGGGAGGTGCAGGTGTCTGCAGTGTGAGAGAGCCGCTGGGCTCGCCAGGTGTTGC<br>CTGAAGCCCTCCGTGGCCTCTTGCCCTTGGA CTCTGACAGGAGGGACACC       |
| FP000345 | CGTTTT- <u>CACCC</u> -<br>TGGAAGGAGTTTGGGTTTCAAGTGTGACGAGGCGCTATTAAAGAGTTTAAACATGGAAATTACTCGA<br>TCTGATGTTGTGTAGTGTCTGTTTGTAGTCATCTTTCCAACTATAATACATTTTTTTTTTCTAAAAA<br>TGGTCGTTAAAGCAGCCTAGGACTTAGGTCAATTGCGGTGGTCACTTGACCGCCTGTGAGGAGCGGCCG<br>GTG- <u>GGGTG</u> -GATCGGACTGGGCGTGGCGGGGGCTCAGGAAGGA- <u>GGGTG</u> -<br>GCCCTACCCAGCGGGCTCGGCTCGGGGCCTCCGCGCAGTTGCGGGTCTT- <u>CACCC</u> -<br>GCCGGCTCCAGGTAGGCTACTCCTCAGGTAAGCCCCGCCGCCAGCCGCGACGTCGTCGAGACAGGCAC<br>CGCCCCCACTCGTGGCGCGAGTAGTCCTGCCCTCCGCGTTGTCTCCGGCCG |
| FP010429 | CTGCAGGAGAGTGGCTTTTATTAAAGCTCTTTTGCTTCTTAGAGAATGTTATCACCACTTAACATCCTCTG<br>CCTCCAATTTAGTGCACTTTAAGTCCAGAAA- <u>CACCC</u> -<br>AGAGTAAGTGGCTTTTCTGTCTCCCTGTTCTGGGAAGTATGAAGGACTGCCCCGAAAAGAGTACAGGG<br>AGGGGGGGATTCTTGATCCATGCACAGCGATGTGAGCTGAGGTGCAGGCACCAGACCTAGGAATTCTTA<br>GAAAAATAGTCAGGAAGCATTAGACACATCAAATGTTAAACGAGTCCTGATTATGATGATAATGATGA<br>TGATTTTGGTGGTTGCAATAGCAAAGCCTTAAGTATGAAGGAGACTTGCCAGCTGGAATACAGGTCCGT<br>AGCAGCATTAAAGTATCTAGAGGAGCTGCAAATATTATTTTTTGTGTGCTATTTTATTTCTTT                            |
| FP009059 | ATGCAGATTTCTCTGAGCTCTTAGCGCCCCGAGAAGGGGGAGAAAAACAGGATATTTAGGCAAACAA<br>ATGAAAGAAGTGCTGCCCTGAAAGG- <u>GGGTG</u> -GTGGTGGGGAG- <u>CACCC</u> -<br>CCAAGCTGCTCGCAAGTTCTGATTGGACGCAAGCATTAAACCGGAGGGCTTTGTGGTCTGGGTCACTG<br>TGTGTTTTTGTAGATTCAATTTGTTGAGGAATTTCCCCTAGCCTTGACCCCTTGACAGCTCCCGCTCCTA<br>CTCAGTGTGGGGAGAAGTAGGGAGGCCTTAAGCGAAGAGATGGGTCTGCATTTGGAGGAGCCGGAC                                                                                                                                                        |

|          |                                                                                                                                                                                                                                                                                                                                                                                                                                                                                                                                       |
|----------|---------------------------------------------------------------------------------------------------------------------------------------------------------------------------------------------------------------------------------------------------------------------------------------------------------------------------------------------------------------------------------------------------------------------------------------------------------------------------------------------------------------------------------------|
|          | ACTGTTGACTTTCCTGATGTGAAATCTACCCAGGAACAAAACACCAGGTGATCCCAGTGGCCGAGCCAG<br>CAGTGGACAGAT- <u>CACCC</u> -CTTAGGTGGAAGCCCAAAGCGGAGGGCACTGTATTGGTCT                                                                                                                                                                                                                                                                                                                                                                                         |
| FP005350 | CTCAGAGCTGAGGTGGGAGATCTGCTCTTCCAGCCCGCCTCTCCTCCTCCAGCTCCCCAGCTCCACTCAA<br>ATTCAGTCCCCCTCCCCCTGCC- <u>CACCC</u> -<br>CCGCCACTCGGTGACTAAGAACTGCTGCAAGCAGGCAAACCTCCGAGCAGTTTTTAAGAGGCTGGAAGG<br>AGACATAAGAGACTTCAGCTGCTGCATTCCAAGCCCTGGGTCTACCTTGGAGACAGGACAGCACAGACT<br>TACTCTCCACAAAGGGACTTCTGGGTCATGGGGCCCAAGACACTCCCACAGCTCGCTGGGAAATGGCAA<br>GTGCTGTGCATGTTGTCTTGTGCTGCTGGGGCT- <u>GGGTG</u> -<br>TCTGGGCAGCTTCGTTACTCAGTGGTGGAGGAGTCTGAGCCGGGGACGCTGGTGGGGAATGTTGCTCAGG<br>ATCTGGGCTTAAAGATGACAGATCTGTTGAGCCGGCG                   |
| FP008185 | GATTTGAGGCATTGTCATCCCCCG- <u>CACCC</u> -<br>CTCCCCACGTGGCCTTCTGGCACGAGCCGCTGGCTCGCCGCCTCATTTACATCAGAAAGC- <u>GGGTG</u> -<br>CCGGCCAATAGGCGCGCAGCCTCGCGCCAGCTGGCGGCGCCG- <u>CACCC</u> -<br>ACCAGCCTATATAAGGGCGCGCAGCGTAGTAGGGGCGCACTCGCTGGTGGTGGCGCGCCGTGCTGAGC<br>TCTGGCTGTCACTGTGTTCTGCCCGCTCCCTCCGCGCTCTCCGCTTGTGGATAACTAGTGTCTGGTTGAT<br>CGCACTATGACTCTGGAAGAAGTCCGCGGCCAGGACACAGTTCCGAAAGCACAGCCAGGTGGGTTTCA<br>GGGCGCTGAGAAAGCCGCTGGTGGTCCGCGACCGTCAGGGTTTTCCA- <u>GGGTG</u> -<br>GGAATCCGCGGGGTAGGAGGGGAGCGCGGGGTCCGGCGCCAGATCC |
| FP009599 | CCACAGGACCTGGGCACTGGACCTTATGATGTGCTTCTCTGGAGTGAAGACTGGCTGTACCTCAGCCCC<br>CTCTCCTTTCTTCTGCTGCCATATCATTCTTCACATGCCTACCAGCCCCCTGGAATCTGCCCTG- <u>CACCC</u> -<br>TCATCCCTTATATATTTGCAGAGAGCGTTTAGAGGACTGGAAGTGTGGCATGTAATGGTATCTCTGTTTC-<br><u>CACCC</u> -<br>CGCAGCCACCTTGGGACACCTTGACTCCAAGCCCAGCAGTAAGTCCAACATGATTCTGGGGCCGCAACT<br>CAGCCACCTCTGCTGATGAGCAGCCCCACATTGAAAACCTACCGGCTCCTCAAGACCATTGGCAAGGGTA<br>ATTTTGCCAAGGTGAAGTTGGCCCCGACACATCTGACTGGGAAAGAGGTGAGCACTGGGACTGGGGACA<br>TGGCAGCACCTCCCAGCCCTGTTGACAC                    |
| FP003211 | TGGACTGTTACAATATTCAGTGGCCTATCAGAAGAGGTGAGTTAAATATT- <u>CACCC</u> -<br>AGGCCCTGGGGGCTCTTTACAGCTGTTCTGGCAGATATTGAAGTAATATGGTCTCATGCGATACAAAA<br>TACTTGGAATCCCACTGAAAGATTTAAAGGTGAGCTAAAATCCTCAGTTATTTGGATTGTTTTTAAGATT<br>CTTGGTCAATGAAAGTACACGTTACCGAGTTGTTTGTAAATATAGTGTCTTCTTGAACATTCTTGACCT<br>CA- <u>GGGTG</u> -<br>AGGATTCTTGGTGGCATGAGGATGTCTTTCTTCTTCACTTAATTCCCTTCTGGTGCTTTTTTCTTCTCTGT<br>TTCTTTGGTGTCTTATTACTCGAATCAGCAAGCTTGCTCATTTTTGTCTTCTTTGGACCTTACTGACACA<br>TCAGTTGTCTTATTTTGTATTTTACAAGTT                            |
| FP003847 | CTTCTTAAAGGAGGAGCTTTCTCCTCTCACCTCAAGGACTGTTATTTATTTGTCTGCGCTACTCTTTCGAC<br>GTTTCCATTCTCTTGGTCTCAAGATGTGAAT- <u>CACCC</u> -<br>ATTTTTCCGTAGGGGGGAAGACGGCGTATCTCTGGCCCTTTAAATAGGGGCGTGGTGAAGAGGCGCGG<br>ACCGCCCAGGAGGGGGAGCAGTGCGAGGAGGAAAGCGGAAGCGCTGCCCGCAGTGGTAGGTAGTGCGC<br>GTGCGTAGGGCTAGAGCAGT- <u>GGGTG</u> -<br>CGGTACGTGGGCCGGCGGTCCACGGCCGGAATGGCAGCAAGCTCAGGTAACGAGTTTCCAGAGAGCG<br>GGCCCGTGAAGGAGACAGGATTGAGGGGCCGTATTAGGGTAGGAGGAGCGCGCGACAGGTCTCT<br>GAGCCTCGGCGTCTCTCCCCGCGGACAGCGGGGACCTCGG                             |
| FP014009 | CCGGGTTTCTGGGCTACTACGATGGCGATGAGTTTCAGTGGCCGTGGCAGTATCGCTTCC- <u>CACCC</u> -<br>TTCTTTACGTGAGGCTCAGACCCCAAGAAGCACCGCTGTGCCTCCCTCCCCTCCCCCGACCCTGGGCTC<br>AGCCCTGATGCTTCATATGGGGAGGGGGAGAAAAGACCCGTCGGCCAA- <u>CACCC</u> -<br>TCAGTCCCTTACTTTCTCTGAAATGCGTCCCGGGCAAGTGTGCTCCCGCCCTCTAATTCTGCGCCCC<br>ACTCCCTT- <u>CACCC</u> -                                                                                                                                                                                                          |

|          |                                                                                                                                                                                                                                                                                                                                                                                                                                                                                                                                   |
|----------|-----------------------------------------------------------------------------------------------------------------------------------------------------------------------------------------------------------------------------------------------------------------------------------------------------------------------------------------------------------------------------------------------------------------------------------------------------------------------------------------------------------------------------------|
|          | GGCAGGTTACAACCGAATGTGGACACTCGGCAGAAGCAGCTGGCCGCTGGTGCTCGCTGGTCCTGTCTCTGCGCGCTGCACAAACAGTCCAGCATGACGGTGATGGAAGCTCAGGAGAGCCCGCTCTTCAACAACGTC AAGCTACAGCGTATCCTCCCTCAGGCTCTTCCACAG                                                                                                                                                                                                                                                                                                                                                   |
| FP007067 | ATGGGGAGTGTAAGAGGCACTAGCAAAGTCCGAGATGAATGTGAATATGAAGTATCAGCTTCCCAACTTCACCGCGGAAA- <u>CACCC-</u> ATCCAGAATGTCATTCTACATGAGCATCACATTTTCCTTGGTGCCACTAACTACATTTATGTTTTAAATGAGGAAGACCTTCAGAAGGTTGCTGAGTACAAGACTGGGCCTGTGCTGGAA- <u>CACCC-</u> AGATTGTTTTCCCATGTCAGGACTGCAGCAGCAAAGCCAATTTATCAGGAGGTGTTTGGAAAGATAACATCAACATGGCTCTAGTTGTCGACACCTACTATGATGATCAACTCATTAGCTGTGGCAGCGTCAACAGAGGGA CCTGCCAGCGACATGTCTTTCCCCACAATCATACTGCTGACATACAGTCGGAGGTTCACTGCATATTCTCC CCACAGATAGAAGAGCCAGCCAGTGTC                                         |
| FP002937 | GTTGAGTTCTCTACAGATTGCTCTTGGGTTATTATCTGCCCCCTC- <u>CACCC-CTGA-GGGTG-</u> TCAGTGCTGTGAGGACGCTGGGAACCTGTCTTGCTGGCTGATAAACCCCTGGTTCCTAGAGGGGCT- <u>GGGTG-</u> CAGAGGAGGCGTTCCTTTAGAAATGGGGCAGGCTTGGGGACCACTGCTGTGGTAACGAGTCTGCTGTCC CTCTGTCACTGCCCTATGGGGCTGCGCTTTAGGCTGGGAGTCGGAGAAGGAGCTCTTGCTGTGACTTTG GGGAGCACGCTGTCTATAAGAGTCAGGTACGGCCACTGGGTCACAAGTGGGGCTACAGGCACTGGGGA CTTGGGCCA- <u>GGGTG-</u> GAGGAGGGAGGAGGCATGAGGACTGGTGAGAAGGTGGCATTGAGTGGCTGTGCAAGATGAGAGGGG AGAAGAGCCCTTGGGGGAGTTCAGGCCTAA                             |
| FP013104 | CCGT- <u>CACCC-CCC</u> ATCATACCTCC- <u>CACCC-</u> CCTCCGGGAAGGGAAATTACATTTCCCCATTTTAGCAAG- <u>GGGTG-</u> GCGAGAGGGAAGAATGAGTGAACACAAAGCTGAAAGTACAAGCAGGACGGAAAGTGAAACCGGGCAC AGCCCCAGTATAAGACCCCCCTACCCAGGAGATGGCTGACCAAAGAGGCTGGGCCCGCCATGGGC CAGACGGCAGGCGACCTTGGCTGGCGTGAGTTGAAGCCAG- <u>GGGTG-</u> GGGGGCTTGTTGAGTTGGGCAGAGAATGGACGAGCTTGGCTGGTGAGATGGGGGGTCGAGAGCTGA GAGCAGCAACTTGGCCAAGACTGAGGATTGCGCTGGCTGCTGCATGGGAAGGGAGGCTGGCATGACT- <u>GGGTG-</u> GGGGCCTGGGGCAGTG- <u>GGGTG-</u> GTGGTCTGACCCAGGGCTGGGCAGAGGATGAGAAGG |
| FP000529 | GGAAGTGGCGGAGGCGCGAGGGAGGGAGCAGCAGCAGGAGGCACGCGCCCGCCGGTCCG- <u>CACCC-</u> GGCCCCCGCAGCCGCGCCCGCTGCGCGTCGCGCAGCAGCCATGGCCGAGCGCCGCGCCTTCGCCC AGAAGATCAGCAGGTAAATATCCGGCTGCGGGCGCGCCGCGCCCGCCGAGAAAGAGCCGCGGAG TCCTCCCAGGCCTGGCCTAGGAGGC- <u>GGGTG-</u> GGTGTGGCGGGGCCGGCACCGGATCCCGCGGCCTGGCTCGCGCGGGGCGGAAGGGGTTTCG- <u>GGGTG-</u> GCTGAGGGGGTAGCGGAGGCCTCGCGCCGCCCTCGAACCCCGCCTTCAGCCCGCGCCCGCCGCTGAGC CTCGGCAGGGAGCGGAGAGGGCCGCGGACTCCAGCGCGCCCGCCTCCTCTGCTCCTCGGCGCCCGGG CCTGGACTTCTGCG                                       |
| FP004135 | GCGGGTCTCCATCCGTGGCGCCTCGCCAGCTGCAGGACGACGCGGGCTCTTGAGGGGCAGAGCAGCGCA TCATGCAGGTGAGGGTCGGGACCTGCCGAGC- <u>CACCC-TGGAA-CACCC-</u> AGTGGGTCTCCAGCTGGGCCCCGAAGCCAAGGGACACAAATGGGGAGGGCGGACACAGGAGGTAGGCTC TAACATTTGTTCTTGAAAGTGCTAAATTTTGGCTGCTTCTGTCTAGTTTTGAGAAAAATCCTCTAGGA GAACGCCATTTTTTCAGCCTTTAAGACTTGTGTCTGTGCTGGAGAAAACGTTAAAAAGATTGTTACGTAT TGTGTTTCACACCAAAATCATAGAAATCTTACTGCTGAATACTATTTTGACTTAATAGAGCGGCAACGTT AGCCCAAGTGTAATTCAATTTGGTTGCTCCTCCACTACCTAAAAAATAAGAA                                                    |
| FP017366 | ATTGGTCTCTGTTTTTGTGAATCCCTGTAGGTAGATCTGTCCCCAGGTCTGTGGAAGTGTGAGTTGTGAAGT TTTGTAAAATGGT- <u>CACCC-</u> AACTTAAACTAGGAAATTACGAAGAAGAGAAAAATTGCCCTGTATCTGTTAAGGTTGGTGTAAGGTAC AGGGACAGGGGGGCAACTTCGACTAGAGAAATCCATCTCTCTGTTTTGTCATTTACCAATTATCCCAT                                                                                                                                                                                                                                                                                   |

|          |                                                                                                                                                                                                                                                                                                                                                                                                                                                                                                                    |
|----------|--------------------------------------------------------------------------------------------------------------------------------------------------------------------------------------------------------------------------------------------------------------------------------------------------------------------------------------------------------------------------------------------------------------------------------------------------------------------------------------------------------------------|
|          | CTGCCC- <u>CACCC</u> -<br>CCTGCTGCTGCTGATTTAGTTGGGAGTCTTGGAAGTTGTGGGGGTACAGAATGCTAAGCTGCCTTTCCCA<br>CTCTCCACTGCTTGTCTGCTCTCACGCTTGAACCTAGTCTAATCTGAACGAGGGACATTCTAGGGCAATC<br>ACTGAAGAGGAAGATGGTGGGCAATAGGAAGGAGGAGGAGTAGCCCTGAAACAAAGCAGTGGGG<br>G                                                                                                                                                                                                                                                                |
| FP003318 | GTTCCCCCATCCCAG- <u>CACCC</u> -<br>TCCCTCGCCACCTCGGCCGCGTCCAGAAGCGTCTCATTACAGATAGAGGTACCCAGCCGGGCCCCAGGTCT<br>CACCTGGGTCAGCATTGTCCCGCTGAGAGCTTTCAAACAACAGGTGTACGCGAATCAGTATCAAAAAGC<br>CTCCAGGGAAGTGAACAAAACAGTCTGACTTCCGGGATTTCGCGGCATCCACTTTTATTCTCACGTTTCC<br>TCTTAATTTCTCGCGAGATACTGATTTGCTCGCGCTATAGAATCTTGTCTGAAGAGGCTTAGCTCCCGCG<br>GGAGATTTCTGTGCGCAGTTACTTCCGGTAGCTGGTAAAGGCTGATACTTCCCAGGACGCGGAGGTAACG<br>GGCCAGGGCCAAAGCGACTTTCGCTACTTGGATTGGTTCGGCGTAGCTTTGGGCGGCCGACCTTAGAAA<br>GTCACACATCTGC        |
| FP001165 | GTCACAAGGTTCC- <u>CACCC</u> -<br>ACTGGAGTCCCTCCCGTGTGCCACCAACCAGCACTTTTGTCTGCTGGGAAAACCTCC- <u>CACCC</u> -<br>AGGCCTTTGCCCTGAGTCCAGGGTCTGTGCCCTAACCCACAGTCACTGAGAGCAACTGGAGGCCACAT<br>AAAACAGACATCTCTTGTTTCCAGATACTACGGGTCATAATCCCTAACTCCAATCACTGGCAACTCCTG<br>AGATCAGAGGAAAACAGCAACAGCGTGGGAGTTGGGGAGAGGCATTCCATACCAGATTCTGTGGCCT<br>GCAGGTGACATGCTGCCTAAGAGAAGCAGGTAGGAAATCTGTTGGGGACCAAGACTAAATGTAATAA<br>AATACAGATAATGCTGGGGGCTAGGCATAGTGGCTCACGTGTGTCATTCCAGCACTTTGGGAGGCCAAG<br>GTGGGGGGATCGCTTGAGCCCAGG     |
| FP001272 | TTTTTAAAAAGAACTCCAAACAGACTTCTGGAAGGTTATTTTCTAAGAATCTTGCTGGCAGCGTGAAGG<br>CAACCCCCCTGTGCACAGCCC- <u>CACCC</u> -<br>AGCCTCACGTGGCCACCTCTGTCTTCCCCATGAAGGGCTGGCTCCCCAGTATATATAAACCTCTCTGGA<br>GCTCGGGCATGAGCCAGCAAGGC- <u>CACCC</u> -<br>ATCCAGGCACCTCTCAGCACAGCAGAGCTTTCCAGAGGAAGCCTACCAAGCCTCTGCAATGAGGTTCTT<br>CTGTGCACGTTGCTGCAGCTTTGGGCCTGAGATGCCAGCTGTCCAGCTGCTGCTTCTGGCCTGCCTGGTGT<br>GGGATGTGGGGGCCAGGACAGCTCAGCTCAGGAAGGCCAATGACCAGAGTGGCCGATGCCAGTATACC<br>TTCAGTGTGGCCAGTCCCAATGAATCCAGCTGCCCAGAGCAGAGCCAG |
| FP013976 | CTCGCCCTTCTTGCCCTGCTTTTCTTACTGTGCTCTGTTCCGTACCACTAGCTCCCTCCCGCGCGGCTCT<br>GAGTCCCGCTTGCCACTAGTTGCTTCTCGGCAGCCCC- <u>CACCC</u> -<br>CTACGCGTGGTCCGCCCCGGCGGCTGGCGCAGGTTATAAAGGTCCCGCCGAGCAGCGGACGGCAGACT<br>CGAGATGCGCCCAAGAGGTTGGGCCGTGCTGCGCGGGGAGCCGGCTCGGACCCGGGGACCCAGCAG<br>CACTCACCTGTGCACCTTCGCCCTCAGCCAGTCCCGCTCCGAGCCCTCTGCGCAGCCGAGGCACGGGG<br>CACTGGACAGAGAGTAGGATCCCAGCCACCTCTGGATCCCAGTTCCTCTCGGAAGCCCGCACCGGAGC<br>TCGCCCCGCCCTCGGAGGCTGGAGCCAAGGCAGGAGCCCCGGCGCCCGTCCGATTCTCGGCC                    |
| FP017441 | GCTCTCCAGCAGCCCAGCCCTTTCCAGGGCTGGGGCAGGAGATTGCTACATGTAGGCTTATCTGGGGAA<br>AAACCAGAGCCTCACTTTAGTCCCTTCCGGTAATTGACACTACTGGA- <u>CACCC</u> -<br>AGGAGGGGGAGGAGAGAGCTTCTCTTCATAAATGTTCC- <u>CACCC</u> -<br>CTGGGCAAGGTGGTCACTCTGGCAGGTAGGAACAGGGGAGAGTGCACCTGCTACCAGTCAAGCTCAGC<br>CAGACTGCAAGAGGAGGCGAGGCGGAGCCAGCCAGGGAGTGAACCATGGACAAGTTGAAATGCCCG<br>AGTTTCTTCAAGTGCAGGGAGAAGGAGGTAGGGGTCTGGGAGCTGCGGGAGGTGTGGAGGACCTGAGA<br>GTGGAAAACCTTAAGGGGGGTTGCTAGTCTCAGTTTTGTCTTCTGTGGCTGTTCTGTGCTCCACATTCT<br>GTTCAACTAT    |
| FP003053 | AGGATTAGAAAGTGGAGCAGCAACCGGAGGCGTCTCTGGGCCGCCCCCAACCCCC- <u>CACCC</u> -<br>CGCCTCGCCCACTC- <u>CACCC</u> -<br>TCACACTGGCGTTGCCACAGTCCCTCCATTCCAGAGGGAATTCCAGAGCGGAATACGGATTCCGATTTTA                                                                                                                                                                                                                                                                                                                                |

|          |                                                                                                                                                                                                                                                                                                                                                                                                                                                                                                                                     |
|----------|-------------------------------------------------------------------------------------------------------------------------------------------------------------------------------------------------------------------------------------------------------------------------------------------------------------------------------------------------------------------------------------------------------------------------------------------------------------------------------------------------------------------------------------|
|          | AAATAAGCGCTTCTAAATCTTTCTCCTTGCATCTAAGAC- <u>GGGTG</u> -<br>GGGAAAAGAAAGGGAGAGGAGTTGAGGTCCCAAGGTTCAAGGCCTGGTGATCTCCAGGTCCCAGGCTG<br>GGCGGCTCGGTGCACGGAGAGGGCGAGGGGCGTGTGTGGAGCCTTGGCAAGGCGCTGCTCTTCCTCG<br>CGCCTCGGTTTGCGGTCTGTGAAATGGGGTTGGCAGTGCCTTTCAGGGACGCGGCGAACTCAAGCACCA<br>GCAAGCGGACTCGAACTCAAAGGGTTCA- <u>GGGTG</u> -TAGACGACCAGAGC                                                                                                                                                                                       |
| FP002378 | GTGAGCGACGTCCATT- <u>CACCC</u> -ACCTCGCCGCGACC- <u>CACCC</u> -<br>TGGGATATGTAGTGCCTGACTTCCGAGTGACGCTGCGCCTGCCGGGCATTTTTCTGGTTTGGGGCA<br>AGGTCTCATGGGAAAGGTCATGTCTCTGAAGAAAGTTATAAACCTGAGATATGAGGGTTGGGCGAG<br>ACATCCGAGCCTGTTTCGTTCCGTGTTGGGACCAGGAATAACCCTGACTTCTGAGCTTTCATAACCCAG<br>GATCCTCCAGAAAATTTGCGGCGCGCTGAGGGAAAACCTTGCTGGCAAGTCGGGACTGTGTGGCAGCGG<br>CTATTTTTCTTTCC- <u>CACCC</u> -<br>AGCACGTTTTCGGGCTGGGGACATAGGGTTCAGTTGAGATACGGAGGCTTCCTTCGGGATATTGGGTTCT<br>CTGAAGTGCGGATGGACTAGGGCAGGGCTGAGACCCATTG                |
| FP010292 | CAGGTTCTTCCTCAGGAAAAGCCAAGGTCAGGCGCAACTTTGCCAAATCCCTGCCCTCCTCAGGCTG<br>GAGACAC- <u>CACCC</u> -<br>CCAAACTCACCATGCGGGGAGGGAAGAAGTCTGGTAGGGACTCTATTGCAACAGGGCCCCAGCCTTAT<br>AAAAAGCCTGGTAACCCGGCCATTACACATCCTGTCTGTGTGGAGCTGGCTGGAATCTCTCAGCC<br>TCACCTGCCAGACAA- <u>CACCC</u> -CCTCCTCCT- <u>CACCC</u> -<br>TGTCTCTGCATTCTCTGAAACCTTCATCCACACAATGCCTCCAACTCACTGGCTACTACCGCTTTGT<br>CTCGCAGAAGAATGGAGGACTACCTGCAAGCCCTAAGTAATGGCTCGCCCTCCAGACCCCTGTCA<br>CTCCCTTCTCCCTCTCTCCTGCTTCTTGGTCCCATGGAGAAGAGGGAATG                           |
| FP001502 | CTGTGTGGGGTAGGGCAGGGTCCACACTCCTTCCCATCCATTTAGAGGAGGAAGCTGGAGTCTGGGAA<br>GGGATGGGATTTTCCAGGG- <u>CACCC</u> -<br>TGTGAGTCACATGCCACTTGAGACAAGGGTCTAGAGCTCCAGCATTTTCCAAGCTACAAATGTATCTGCT<br>GCTCCAAGTGTCTAGATCAGGACCCTAGGTAAAGACTTCTGAAAAATACTTGAGTCTAGAAACAGAAA<br>AGAAAAAGGGTAGTGTGCTCTAGGGGTTTGCACTGTTGTACCCAGTTTGCTTGTGCTCTAGGAAA<br>GGTCCTTTCTGGGGAT- <u>CACCC</u> -<br>CATTGGCTGAAGATGAGACCATTCTCCTCTTGTGTTTTGGTAAGTACCCCTTCCCATCCTTCCAGGCCCTG<br>TTATATGGCAGGGAGGCAACAGCCACAGGGAGAAGGAGAGTTTACCAAAGTGTTG                        |
| FP011777 | TCTGGGCTGAATAGGTGGTCCACTCTGAGTCATCAGCTGT- <u>GGGTG</u> -<br>ATGATGTGGTCACTGCATGATTCTACACAAG- <u>CACCC</u> -AGAGGACGTCATCAGGCAGAGGCAGTGG-<br><u>GGGTG</u> -<br>GGCAGCATTTACAGAAAATCTGTGATGAGACACCACAAAACCAGAGGGGAACATGAAGTCACTGAGCC<br>TGCTCCACCTCTTCTCTCCCAAGAGCTAAAAGAGAGCAAGGAGGAAACAACAGCAGCTCCAACCAGG<br>GCAGCCTTCTGAGAAGATGCAACCAATCCTGCTTCTGCTGGCCTTCTCTGCTGCCAGGGCAGATGC<br>AGGTGAGTGACCGTCTC- <u>CACCC</u> -<br>TCGGGGGGCCCAACCCATCCACAGGTCTCCTGCCCTTCTCCACATTCTGATCCATCTATCTACCAGGA<br>ATGTTCTGAACTCCAGCTCCATTCTACCAAGACCC |
| FP010713 | CATACGAATCTAGCCCGGGAACCGAGTTGCGGGAGTGCGGTCTGTGCCGTTCCGGCCAGGAGTTTGCCG<br>ACTGCAGACGTCTGCGAACCGGCAAGATGTGCTCTCTGGGGTTGTTCCTCTCCACCGCCTCGGGGTC<br>AAGT- <u>CACCC</u> -<br>TATATGAGCACAATAACGAGCTGGTGACGGGCAGTAGCTATGAGAGCCCCGCCCCCGACTTCCGGGGCC<br>AGGTGGCCAGGGCGAGGAGGGAGGGGACCTACAGGCATGGGGGCGGAGTCGGGGACTACTGGGGA<br>GGAGGCAGTGTGACAGGGGCGAGGGTCACAGAGTCTGGCGGAGTGGAACAGCTTGGCCCCGGCAGGAG<br>GCTAGAAGGGCTGGAATCTGTTTTAGGACTGGGATTGGAGTATAACGGGGGAACGGTTAAGGAGCTGTG<br>GAGGAGCCTAGAGGGAATGGAGAGAATGA                                |



|          |                                                                                                                                                                                                                                                                                                                                                                                                                                                                                                     |
|----------|-----------------------------------------------------------------------------------------------------------------------------------------------------------------------------------------------------------------------------------------------------------------------------------------------------------------------------------------------------------------------------------------------------------------------------------------------------------------------------------------------------|
| FP015337 | AGGTAGGGAGAGAGAGCTGAGGCCCCAGATCAGCGGCCGCGGGCAAGGTCGCTCAGCGGG- <u>CACCC</u> -GGCCTGGGTATCGGGGCGCGGGTCGGGGGCGGGGCCGGGGCTCAG- <u>GGGTG</u> -GGGCCGGGCGCGGGCCGGGCGGGCGCCTGCGCCATAAAGGCCGCCGCGCGCCACGCGCCTCGCTTGCTGCGCGCTGCCGGCGCTCCTTCCTCCTCGGCTCGCGTCTCACTCAGTGTAACCTTCTAGTCCCGCCATGGCCGCTCT- <u>CACCC</u> -GGGACCCCCAGTTCAGAAAGCTGCAGCAATGGTACC GCGAGCACCGCTCCGAGCTGAACCTGCGCCGCCCTTCGATGCCAACAAAGGACCGCTTCAACCACTTCAGGTGCGGGCGGGCCGGAGGCGGGGGCTGCCACGCGCGCGCCCGGAACCGGGCACGCGGGCCTGGGGTCTGGAGGCGGGGG |
| FP000316 | GGCTCCGGGGGAGAAGACTACAGTAAGGGCGAGCAGAGCTGAATGCTTTATGTCGGAATCGACCAATGGGATGGCGG- <u>CACCC</u> -GGTTGCCAGGGCTACGGCCAAGCGGAGGTAGGGCCTCGGCACTATGGGCGGGGCTGGGCGGGGTATATAAGCCAGCGGCGGGCGGAAGGCGGGGCGTGGGGGTCTGTGGCTGCTGGGCTGGCGGGGCGCAGGCCGCGGACCCGAGCCCGGGGAAGCGAGAGAGCGGAGGCGCCGAGGATCCGATTCACTCCCTGGGGAGACCTATGGGCCGAAGCCGTGTAAATGCGTTTTAAGGCGAGTGCGGAAAGTGGCCTGGGGAGCCTCGGGGAGCGGACGCCCTCCGCCCTGGTGCTGACCTGCCTCCCTGCCCCCTTCTGCCTCCTGTACGAGAGGCCTCGGCTCAGCAACTGCCACTCCTCCTCGG                           |
| FP002584 | CCCTCCCCTGGGTGCTCCCC- <u>CACCC</u> -ATTTCCCGCTTGCTTTCTCTCTTCTCTCTCCCTCCTCCCTGCGGAAGCGGAAGTGACGCGAGGCGTAGCGGAAGTTACTGCAGCCGCGGTGTTGTGCTGTGGGGAAGGGAGAAGGATTGTAAACCCCGGAGCGAGGTTCTGCTTACCCGAGGCCGCTGCTGTGCGGAGACCCCC- <u>GGGTG</u> -AAGCCACCGTCATCATGTCTGACCAGGTACCGGGCTGGGAGCCATCCAACGGCGGTGGCCAGGGCCTTCCTGCAGGTCTGCCTGCCGCTAGGCTGGGGTCGGGGATGGAGGCGCGGGGAGGGGAGCGCGGAATGGGGAGGGGGCGGCCGTGGGGACTAGGCAGGCGAGGGAGAGGAGCCGACTACGGCCGAGGTGCCGGGCCTGCTGCGGGGCTCCCGAGCCGCCGCCCT                            |
| FP006713 | GGGCAAGCCTGGCAGGGCAGAGGGAGCCCCGGCTCCGAGGTTGCTCTTCG- <u>CACCC</u> -GAGGATCAGTCTTGCCCCCAAAGCGCGACGCACAAATCCACGTGAGTGTTTTCAAATTGAATTTCAATAGAAAACTTGGGGTAACTGGTGAATTTAAAAAAAAAAAAACACAGTAAAGAAAAAGCGGTAAGGTTGGTAGACCTGGTGTCGCTCAGGTCCGCCTCTCTTTCTGAGGACAGTGAGAGAGTTCACTTCTGTCAAGCGTCTGTTGCTCTGCACTGTGCCAGCAGGTGCAGGACCAGGCCGACATGGGACACTTCTGAGCAGCCCCGCTGTCAACAGGAGAGGAGTTCTAGCTCCCAACCATATTTAAATTTATGTAGACCTACATATACCCACGGAAGTACGCTTTATAAAGTCGTGTGTAAGAGTTTTTCCTATATTGAGCCGG                           |
| FP016947 | CAGCCAATTAGAGCCCGGCCAGACACCGCGACCCCTCCCC- <u>CACCC</u> -GCCCCACTCTGCCCCACTGGCGATTGGGTGCGGGACGCGCGGGGCGGGGCTTCCGGGCGGGGAGGCTGGCTTCCGGCGGGAGCGGGGCCGCGGATGGCCGTATACAGGGCAGCGCTCGGGGCTTCGCTCGCGGCTGCCGACTCTTGCCCCCTCGGTGCTGTTCCCCGTGCGCGGCGCCCCGCTCTACGTTGTGCGGCGCCGCCATGAGCCCCGCGCCTCGCTGGCTGGCGGGGCTGCGCTTCGACAACCGCGCCCTGCGCGCCCTGCCCGTGGAGGCGCCGCGGCCGGTCCCGAGGGCGCCCCGTCCGCGCCGCGGCCCTGCCCGGGGCTGCTT- <u>CACCC</u> -GCGTGACCC- <u>CACCC</u> -CGCTGCGGCAGCCGCGCCTCGTGGCGCTGTACAGACCCGCGCTG         |

**Supplemental Table S2.** Transcription factors interactions according to the STRING database. The table shows direct interactions between non-members of the KLF family and their target genes.

| Transcription factor family | Gene  | Direct interaction                                                                                                                                                                                                                                                |
|-----------------------------|-------|-------------------------------------------------------------------------------------------------------------------------------------------------------------------------------------------------------------------------------------------------------------------|
| SP                          | SP1   | COL1A1, NR3C1, TBPL1, TBPL2 MYOD1, HBZ, MDM2, EPAS1, ICAM1, LEF1, RB1, NCOR1, MBNL1, FASN, FOS, HCFC1, PRKACA, DHFR2, HNF1A, MEF2C, IL6, DMPK, MTOR, FHL2, TFDP2, NF1, FDFT1, NCOA1, TFAP2A, ESR1                                                                 |
| SP                          | SP2   | FHL2                                                                                                                                                                                                                                                              |
| SP                          | SP3   | SLC20A1, NF1, SUMO1, DYRK1A, ESR1                                                                                                                                                                                                                                 |
| SP                          | SP4   | NRL, GJA5                                                                                                                                                                                                                                                         |
| SP                          | SP5   | PEX11B                                                                                                                                                                                                                                                            |
| SP                          | SP6   | HHEX, JAZF1, FHL2, CA1, CAMK1D, TCF7L2                                                                                                                                                                                                                            |
| *SP                         | SP7   | ACP5, STUB1, COL1A1, SOX9, CD68, LEF1, FGF18, PLOD2, TNFRSF11B, SOST, FOS, FGF3, MEF2C, DMP1, ADAMTS4, NES, DKK1, IFITM5, IGF1, MEPE, CCK, IL6, ACAN, CD44, FGF16, ESR1, DLX5                                                                                     |
| SP                          | SP8   | PVALB, LEF1, GAD1, BAG3, TBR1, LHX6, DLX5, ENO1, PAX6                                                                                                                                                                                                             |
| SP                          | SP9   | LHX6                                                                                                                                                                                                                                                              |
| WT                          | WT1   | IL2, IFNG, MLH1, FLT3, SOX9, MYOD1, KRT5, THAP1, MDM2, SULF1, PAX8, EPCAM, LEF1, STAR, ATM, WNT9B, RAD21, MN1, TBX5, NKX2-5, GATA2, NF1, NUP214, RBMX, NFIA, CSF3R, AMER1, VIM, PBX1, TNNT2, CD44, FBXW7, PMEL, CITED1, CD8A, MYH11, IDH1, ESR1, PAX6, IGF2, TET2 |
| PATZ                        | PATZ1 | SNRPC, ESR1, CD8A, NR4A3, NCOR1                                                                                                                                                                                                                                   |
| SALL4                       | SALL4 | TBX3, LEFTY2, ADAMTS18, SOX15, TBR1, EPCAM, PAX8, ALPP, GJA5, KDM2B, EPAS1, TET2, TBX6, PBX1, EED, NKX2-5, TBX5                                                                                                                                                   |
